# Supplementary material
Source: PubMed Central journal article supplement (PMC2586617)
Supplement: NIHMS61876-supplement-si20061130_091.pdf [file NIHMS61876-supplement-si20061130_091.pdf]

## Supplemental Data for IdoA/GlcA Paper

**Figure.** EDD mass spectra of the  $[M-2H]^{2-}$  precursor ion of tetrasaccharide **3** acquired 4 months apart, which demonstrate the excellent reproducibility of EDD fragmentation. (a) EDD of tetrasaccharide **3** on 3/20/06. (b) EDD of tetrasaccharide **3** on 8/1/06. Fragmentation is identical and all diagnostic product ions are observed at similar intensities. The ▼ above the peak labels indicates product ions unique to the GlcA containing HS tetrasaccharide, **3**.

Figure 4

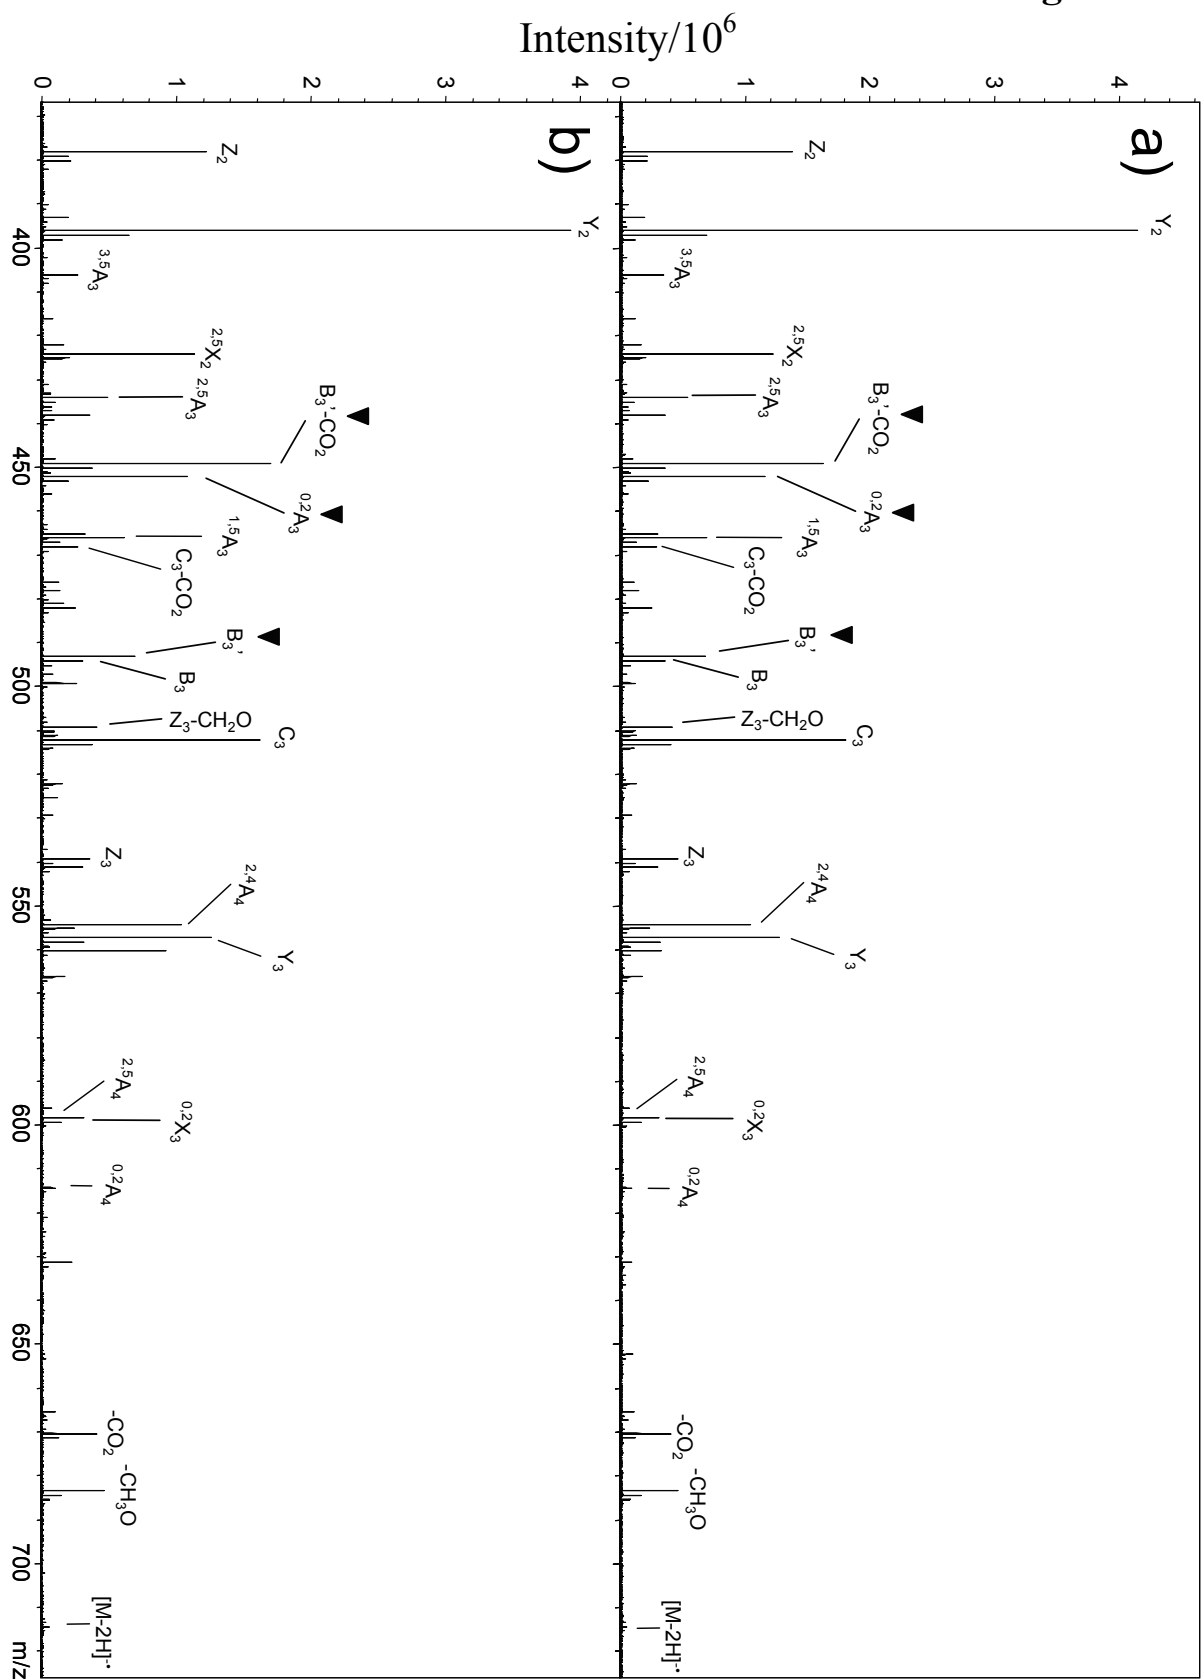

## Mass-to-charge/intensity table for the spectra in Figure 1

| Tetrasaccharide 1 |          | Tetrasaccharide 2 |          | ID                                                                   |
|-------------------|----------|-------------------|----------|----------------------------------------------------------------------|
| m/z               | RI       | m/z               | RI       |                                                                      |
| 157.0142          | 0.112716 | 157.0143          | 0.067786 | B <sub>1</sub>                                                       |
| 173.009           | 0.097941 | 173.0091          | 0.035066 |                                                                      |
| 175.0248          | 0.322369 | 175.0248          | 0.19351  | C <sub>1</sub>                                                       |
| 202.0722          | 0.021727 | 202.072           | 0.011405 | Z <sub>1</sub>                                                       |
| 202.9892          | 0.036285 | 202.9893          | 0.036676 |                                                                      |
| 210.9916          | 0.020361 | 210.9917          | 0.016768 |                                                                      |
| 211.9867          | 0.047084 | 211.9995          | 0.016947 |                                                                      |
| 220.0825          | 0.042944 | 220.0825          | 0.02381  | Y <sub>1</sub>                                                       |
| 222.0076          | 0.165805 | 222.0076          | 0.065311 |                                                                      |
| 240.0181          | 0.064112 | 240.0183          | 0.049768 |                                                                      |
| 258.0287          | 0.08546  | 258.0289          | 0.087397 |                                                                      |
| 259.046           | 0.083033 | 259.0458          | 0.016507 | <sup>2,5</sup> A <sub>2</sub>                                        |
| 272.0533          | 0.017359 | 272.0536          | 0.016875 |                                                                      |
| 273.0616          | 0.049677 | 273.0614          | 0.038031 |                                                                      |
| 277.0563          | 0.020017 | 277.0563          | 0.029097 | <sup>0,2</sup> A <sub>2</sub>                                        |
| 286.0282          | 0.12203  | 286.0236          | 0.035332 |                                                                      |
| 286.0362          | 0.114487 | 286.0362          | 0.087895 |                                                                      |
| 286.5324          | 0.1132   | 286.5321          | 0.019578 | B <sub>3</sub> <sup>2-</sup>                                         |
| 294.5297          | 0.021432 | 294.5298          | 0.06232  | C <sub>3</sub> -2H <sup>2-</sup>                                     |
| 295.5375          | 1.682314 | 295.5375          | 0.489193 | C <sub>3</sub> <sup>2-</sup>                                         |
| 296.5343          | 0.108313 | 296.5345          | 0.037169 |                                                                      |
| 316.5428          | 0.052768 | 316.5427          | 0.069672 | <sup>2,4</sup> A <sub>4</sub> <sup>2-</sup>                          |
| 332.0618          | 0.04182  | 332.0623          | 0.04146  |                                                                      |
| 333.0697          | 0.466127 | 333.0699          | 0.415616 |                                                                      |
| 333.1062          | 0.110742 | 333.1062          | 0.146384 |                                                                      |
| 337.548           | 0.571004 | 337.548           | 0.284969 | <sup>2,5</sup> A <sub>4</sub> <sup>2-</sup>                          |
| 346.5535          | 0.473739 | 346.5536          | 0.400564 | <sup>0,2</sup> A <sub>4</sub> <sup>2-</sup>                          |
| 369.037           | 0.03023  | 369.037           | 0.023211 |                                                                      |
| 370.0454          | 0.218213 | 370.0455          | 0.108467 |                                                                      |
| 372.0605          | 0.115679 | 372.0605          | 0.133251 |                                                                      |
| 376.0882          | 0.347461 | 376.0884          | 0.042075 |                                                                      |
| 377.0959          | 0.859294 | 377.0969          | 0.128271 | Z <sub>2</sub> -H                                                    |
| 378.0994          | 0.132182 | 378.1044          | 0.046084 | Z <sub>2</sub>                                                       |
| 382.5763          | 0.116335 | 382.5756          | 0.015266 |                                                                      |
| 383.0789          | 0.074438 | 383.0795          | 0.027275 |                                                                      |
| 388.0718          | 0.124535 | 388.0711          | 0.076885 |                                                                      |
| 388.5768          | 0.259511 | 388.5771          | 0.078436 |                                                                      |
| 389.0714          | 0.193642 | 389.0753          | 0.119948 | [M-2H-H <sub>2</sub> O] <sup>2-</sup><br>precursor ion <sup>2-</sup> |
| 397.076           | 119.0124 | 397.0761          | 49.67004 |                                                                      |
| 413.0265          | 0.035083 | 413.0267          | 0.035649 |                                                                      |
| 414.0346          | 0.319661 | 414.0347          | 0.25647  |                                                                      |
| 415.0423          | 0.866599 | 415.0424          | 1.10527  | C <sub>2</sub> -H                                                    |
| 415.0785          | 0.671537 | 415.0788          | 0.857938 |                                                                      |

|          |          |          |          |                                                |
|----------|----------|----------|----------|------------------------------------------------|
| 416.0508 | 1        | 416.0507 | 1        | C <sub>2</sub>                                 |
| 440.0508 | 0.213258 | 440.0509 | 0.017395 |                                                |
| 442.0659 | 0.168046 | 442.0662 | 0.027032 | <sup>3,5</sup> A <sub>3</sub> -CO <sub>2</sub> |
| 459.0684 | 1.474862 | 459.0687 | 0.426186 | <sup>2,4</sup> A <sub>3</sub>                  |
| 470.0609 | 0.034169 | 470.0612 | 0.022625 |                                                |
| 486.0558 | 0.605093 | 486.0562 | 0.089661 | <sup>3,5</sup> A <sub>3</sub>                  |
| 496.0403 | 0.065192 |          |          |                                                |
| 504.0661 | 0.044209 | 504.0663 | 0.008438 |                                                |
| 505.0737 | 0.105901 | 505.0744 | 0.195637 |                                                |
| 506.0798 | 0.111196 |          |          |                                                |
| 510.1097 | 0.022053 | 510.1089 | 0.036161 |                                                |
| 512.1265 | 0.019443 | 512.1265 | 0.012311 |                                                |
| 514.0505 | 0.212771 | 514.0494 | 0.011424 | <sup>2,4</sup> A <sub>3</sub>                  |
| 527.0596 | 0.01794  |          |          |                                                |
| 528.0665 | 0.034526 | 528.0677 | 0.015911 |                                                |
| 529.0743 | 0.099136 |          |          | B <sub>3</sub> '-CO <sub>2</sub>               |
| 532.0609 | 0.051666 |          |          | <sup>0,2</sup> A <sub>3</sub>                  |
|          |          | 544.0631 | 0.026706 |                                                |
| 546.0775 | 0.140355 | 546.0767 | 0.224703 | <sup>1,5</sup> A <sub>3</sub>                  |
| 548.0926 | 0.0189   | 548.0958 | 0.014196 | C <sub>3</sub> -CO <sub>2</sub>                |
|          |          | 554.1358 | 0.01818  |                                                |
| 555.0542 | 0.022023 |          |          |                                                |
| 571.1051 | 0.004772 | 571.1086 | 0.011917 |                                                |
| 572.0561 | 0.027979 | 572.057  | 0.013618 |                                                |
| 573.065  | 0.1553   | 573.0643 | 0.011704 | B <sub>3</sub> '                               |
| 574.0712 | 0.116286 | 574.0721 | 0.088508 | B <sub>3</sub>                                 |
| 589.1184 | 0.084124 | 589.1198 | 0.045367 | Z <sub>3</sub> -CH <sub>2</sub> O              |
| 590.0673 | 0.118777 | 590.0671 | 0.357035 | C <sub>3</sub> "                               |
| 592.0827 | 0.176393 | 592.0828 | 0.119569 | C <sub>3</sub>                                 |
| 600.1117 | 0.040436 | 600.1117 | 0.077216 |                                                |
| 619.1298 | 0.298629 | 619.1297 | 0.191542 | Z <sub>3</sub>                                 |
| 634.0936 | 0.026323 | 634.0928 | 0.044409 | <sup>2,4</sup> A <sub>4</sub>                  |
| 637.1413 | 0.035836 | 637.1397 | 0.061999 | Y <sub>3</sub>                                 |
| 646.0941 | 0.017687 | 646.0941 | 0.057862 | <sup>3,5</sup> A <sub>4</sub>                  |
|          |          | 668.1925 | 0.047264 |                                                |
| 678.1436 | 0.032454 | 678.1446 | 0.02704  | <sup>0,2</sup> X <sub>3</sub>                  |
| 694.1144 | 0.063871 | 694.1135 | 0.040289 | <sup>0,2</sup> A <sub>4</sub>                  |
| 749.1584 | 0.020902 | 749.1572 | 0.038651 | [M-2H-CHO <sub>2</sub> ] <sup>-</sup>          |
| 750.1646 | 0.084904 | 750.1627 | 0.033485 | [M-2H-CO <sub>2</sub> ] <sup>-</sup>           |
| 794.153  | 0.01702  | 794.1541 | 0.015973 | [M-2H] <sup>-</sup>                            |

## Mass-to-charge/intensity table for the spectra in Figure 2

| Tetrasaccharide 3 |          | Tetrasaccharide 4 |          | ID                                          |
|-------------------|----------|-------------------|----------|---------------------------------------------|
| m/z               | I        | m/z               | I        |                                             |
| 157.0129          | 0.186454 | 157.013           | 0.196726 | B <sub>1</sub>                              |
| 175.0233          | 1.530121 | 175.0233          | 1.084135 | C <sub>1</sub>                              |
| 202.0703          | 0.016441 | 202.0704          | 0.030469 | Z <sub>1</sub>                              |
| 220.0804          | 0.045258 | 220.0804          | 0.043652 | Y <sub>1</sub>                              |
| 255.5566          | 0.741483 | 255.5565          | 0.192901 | C <sub>3</sub> <sup>2-</sup>                |
| 259.0432          | 0.091871 | 259.043           | 0.13015  | <sup>2,5</sup> A <sub>2</sub>               |
| 276.5615          | 0.05698  | 276.5614          | 0.271499 | <sup>2,4</sup> A <sub>4</sub> <sup>2-</sup> |
| 277.0536          | 0.26103  | 277.0531          | 0.325279 | <sup>0,2</sup> A <sub>2</sub>               |
| 297.5666          | 0.293569 | 297.5663          | 0.435    | <sup>2,4</sup> A <sub>4</sub> <sup>2-</sup> |
| 306.5717          | 0.263051 | 306.5715          | 0.616931 | <sup>0,2</sup> A <sub>4</sub> <sup>2-</sup> |
|                   |          | 307.5172          | 0.572409 |                                             |
| 318.0803          | 0.037498 | 318.0785          | 0.032269 | B <sub>2</sub>                              |
|                   |          | 327.576           | 0.108505 |                                             |
|                   |          | 328.0296          | 0.166245 |                                             |
| 333.1026          | 0.165318 | 333.1022          | 0.144204 |                                             |
| 334.0748          | 0.050872 |                   |          |                                             |
| 334.1104          | 0.282425 | 334.11            | 0.259808 |                                             |
| 336.0898          | 0.519693 | 336.0891          | 0.371991 | C <sub>2</sub>                              |
| 342.5938          | 0.104351 |                   |          |                                             |
| 348.0897          | 4.206264 |                   |          | [M-2H-H <sub>2</sub> O] <sup>2-</sup>       |
|                   |          | 349.0348          | 0.891572 |                                             |
| 357.0944          | 56.56165 | 357.0937          | 61.28651 | precursor ion <sup>2-</sup>                 |
| 378.0996          | 0.339766 | 378.0988          | 0.777172 | Z <sub>2</sub>                              |
| 380.1158          | 0.053156 | 380.1145          | 0.052732 |                                             |
| 396.1097          | 1        | 396.1088          | 1        | Y <sub>2</sub>                              |
| 406.0942          | 0.082536 | 406.0933          | 0.074242 | <sup>3,5</sup> A <sub>3</sub>               |
|                   |          | 416.0441          | 0.228481 |                                             |
| 422.125           | 0.038511 |                   |          |                                             |
| 424.1044          | 0.292544 | 424.1033          | 0.112623 | <sup>1,5</sup> X <sub>2</sub>               |
| 434.0883          | 0.128579 | 434.0563          | 0.038016 | <sup>2,5</sup> A <sub>3</sub>               |
| 434.1481          | 0.08973  | 434.147           | 0.064724 |                                             |
| 438.12            | 0.084592 |                   |          |                                             |
| 449.1113          | 0.39374  |                   |          | B <sub>3</sub> '-CO <sub>2</sub>            |
| 452.0985          | 0.277125 |                   |          | <sup>0,2</sup> A <sub>3</sub>               |
|                   |          | 458.0527          | 0.34884  |                                             |
| 465.1056          | 0.074956 |                   |          |                                             |
| 466.1142          | 0.164485 | 466.1123          | 0.152779 | <sup>1,5</sup> A <sub>3</sub>               |
| 468.1296          | 0.072664 | 468.1284          | 0.036573 | C <sub>3</sub> -CO <sub>2</sub>             |
| 476.1587          | 0.028059 | 476.0629          | 0.133457 |                                             |
| 478.174           | 0.035609 |                   |          |                                             |
| 482.1448          | 0.059947 |                   |          |                                             |
| 493.1016          | 0.176727 |                   |          | B <sub>3</sub> '                            |
| 494.1078          | 0.087772 | 494.1068          | 0.217245 | B <sub>3</sub>                              |
| 499.1225          | 0.028704 |                   |          |                                             |
| 509.155           | 0.098856 | 509.153           | 0.089634 | Z <sub>3</sub> -CH <sub>2</sub> O           |
| 510.1028          | 0.027485 | 510.1003          | 0.103916 | C <sub>3</sub> "                            |
| 512.1185          | 0.433624 | 512.1162          | 0.403658 | C <sub>3</sub>                              |

|          |          |          |          |                                       |
|----------|----------|----------|----------|---------------------------------------|
| 522.1621 | 0.031508 |          |          |                                       |
|          |          | 536.0802 | 0.065892 |                                       |
| 539.165  | 0.114891 | 539.1649 | 0.044245 | Z <sub>3</sub>                        |
| 541.1807 | 0.075062 | 541.1777 | 0.089119 |                                       |
| 554.1283 | 0.248965 | 554.1251 | 0.212519 | <sup>2,4</sup> A <sub>4</sub>         |
| 557.1755 | 0.306407 | 557.1725 | 0.142909 | Y <sub>3</sub>                        |
| 560.1751 | 0.078029 |          |          |                                       |
| 566.1294 | 0.042324 |          |          |                                       |
| 596.137  | 0.019679 | 596.1358 | 0.051822 | <sup>2,5</sup> A <sub>4</sub>         |
| 598.1778 | 0.078654 | 598.1743 | 0.314978 | <sup>0,2</sup> X <sub>3</sub>         |
| 614.15   | 0.021088 | 614.1444 | 0.123784 | <sup>0,2</sup> A <sub>4</sub>         |
| 652.1886 | 0.023747 |          |          |                                       |
| 665.1599 | 0.025538 |          |          |                                       |
| 670.1965 | 0.095483 | 670.1927 | 0.078937 | [M-2H-CO <sub>2</sub> ] <sup>-</sup>  |
| 683.1676 | 0.111147 | 683.1668 | 0.082506 | [M-2H-CH <sub>3</sub> O] <sup>-</sup> |
| 714.1835 | 0.014958 | 714.179  | 0.034296 | [M-2H] <sup>-</sup>                   |
